# Supplementary material
Source: publisher site journal article supplement (http://kjim.org/upload/media/kjim-2020-135-suppl3.pdf)
Supplement: Supplementary file 1 [file kjim-2020-135-suppl3.pdf]

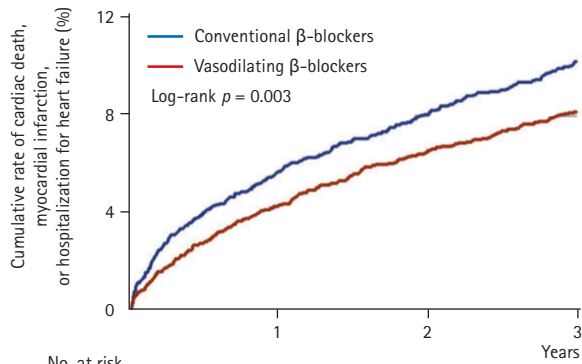

| No. at risk                    |  | Years |       |       |       |
|--------------------------------|--|-------|-------|-------|-------|
| Conventional $\beta$ -blockers |  | 3,661 | 3,342 | 3,153 | 1,881 |
| Vasodilating $\beta$ -blockers |  | 3,608 | 3,342 | 3,136 | 1,933 |

**A**

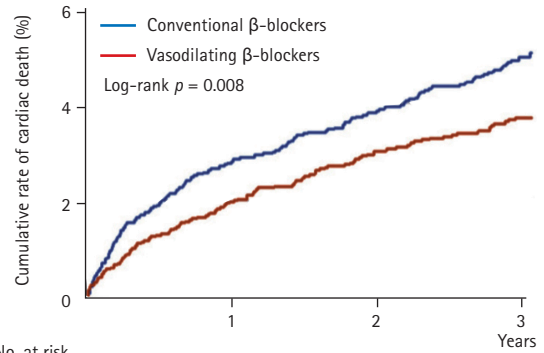

| No. at risk                    |  | Years |       |       |       |
|--------------------------------|--|-------|-------|-------|-------|
| Conventional $\beta$ -blockers |  | 3,661 | 3,440 | 3,292 | 1,981 |
| Vasodilating $\beta$ -blockers |  | 3,608 | 3,419 | 3,245 | 2,011 |

**B**

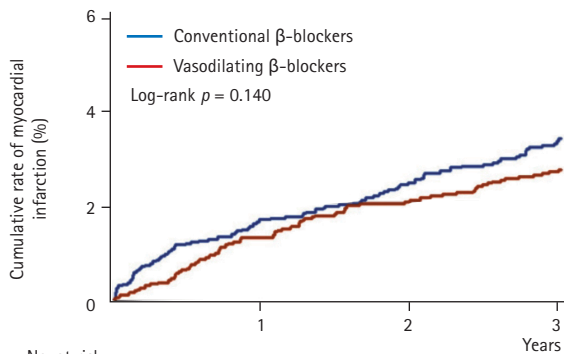

| No. at risk                    |  | Years |       |       |       |
|--------------------------------|--|-------|-------|-------|-------|
| Conventional $\beta$ -blockers |  | 3,661 | 3,410 | 3,250 | 1,954 |
| Vasodilating $\beta$ -blockers |  | 3,608 | 3,397 | 3,209 | 1,981 |

**C**

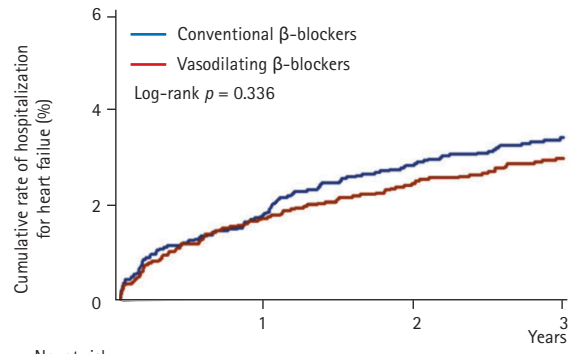

| No. at risk                    |  | Years |       |       |       |
|--------------------------------|--|-------|-------|-------|-------|
| Conventional $\beta$ -blockers |  | 3,661 | 3,395 | 3,230 | 1,941 |
| Vasodilating $\beta$ -blockers |  | 3,608 | 3,389 | 3,205 | 1,988 |

**D**

**Supplementary Figure 1.** Kaplan-Meier curves for 3-year clinical outcomes in vasodilating versus conventional  $\beta$ -blocker groups in the whole study population. (A) A composite of cardiac death, myocardial infarction, or hospitalization for heart failure. (B) Cardiac death. (C) Myocardial infarction. (D) Hospitalization for heart failure.
